# Supplementary material for: CD146 Delineates an Interfascicular Cell Sub-Population in Tendon That Is Recruited during Injury through Its Ligand Laminin-α4
Source: MDPI journal article supplement (doi:10.3390/ijms22189729), 2021-09-08
Supplement: s1 [file s1]

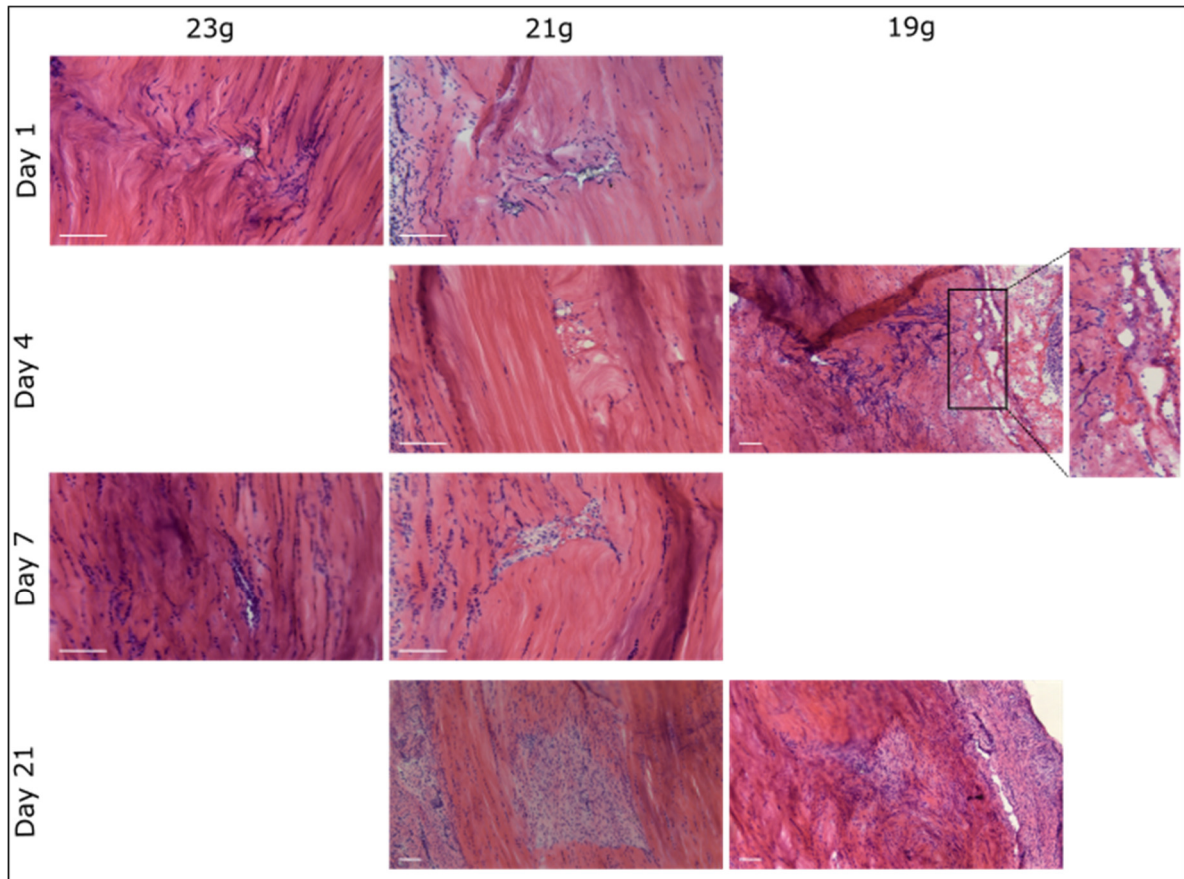

**Figure S1.** Optimisation of needle size and time points. Tendon puncture by 23G needles resulted in small lesions that were difficult to detect 7 days after injury. Use of 19G needles often resulted in damage to the edge of the tendon (see inset at day 4 post injury) and lesion size varied between individuals, particularly 21 days after injury. Using a 21G needle resulted in formation of a well-defined core lesion at all time points assessed, with less variation in lesion appearance between individuals. Scale bar = 100  $\mu$ m. Note that injuries created by 23G and 19G needles were only assessed at days 1 & 7, and days 4 & 21 respectively to keep the number of animals used in preliminary experiments to a minimum.

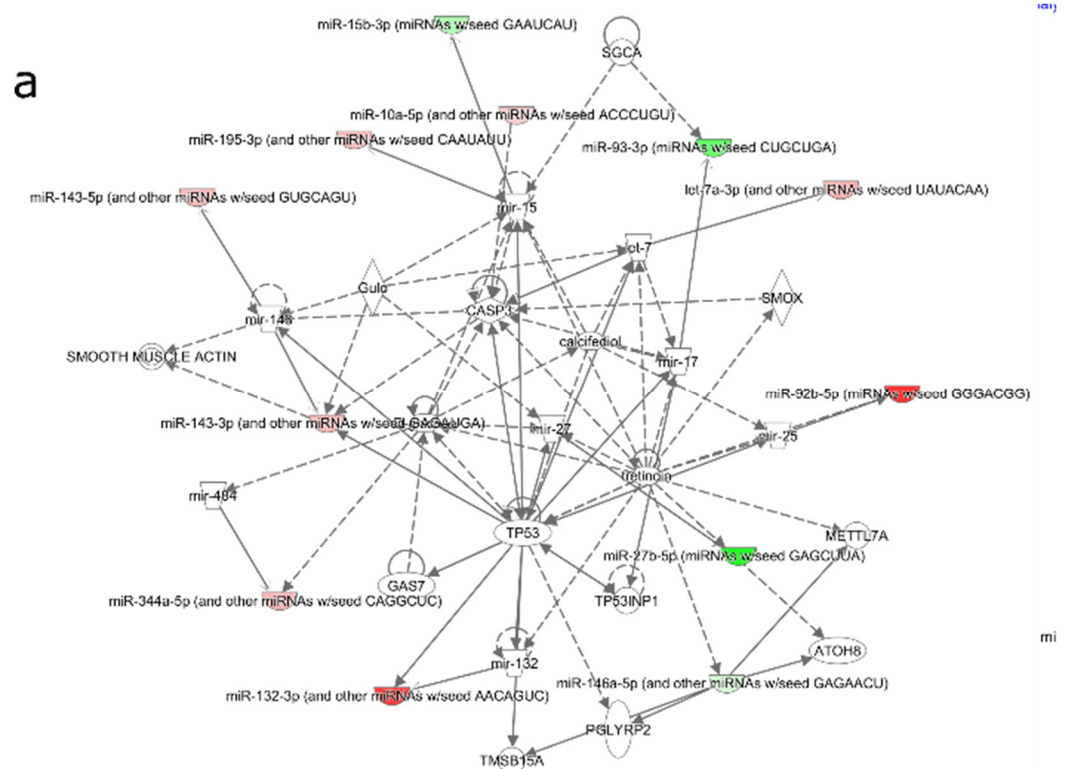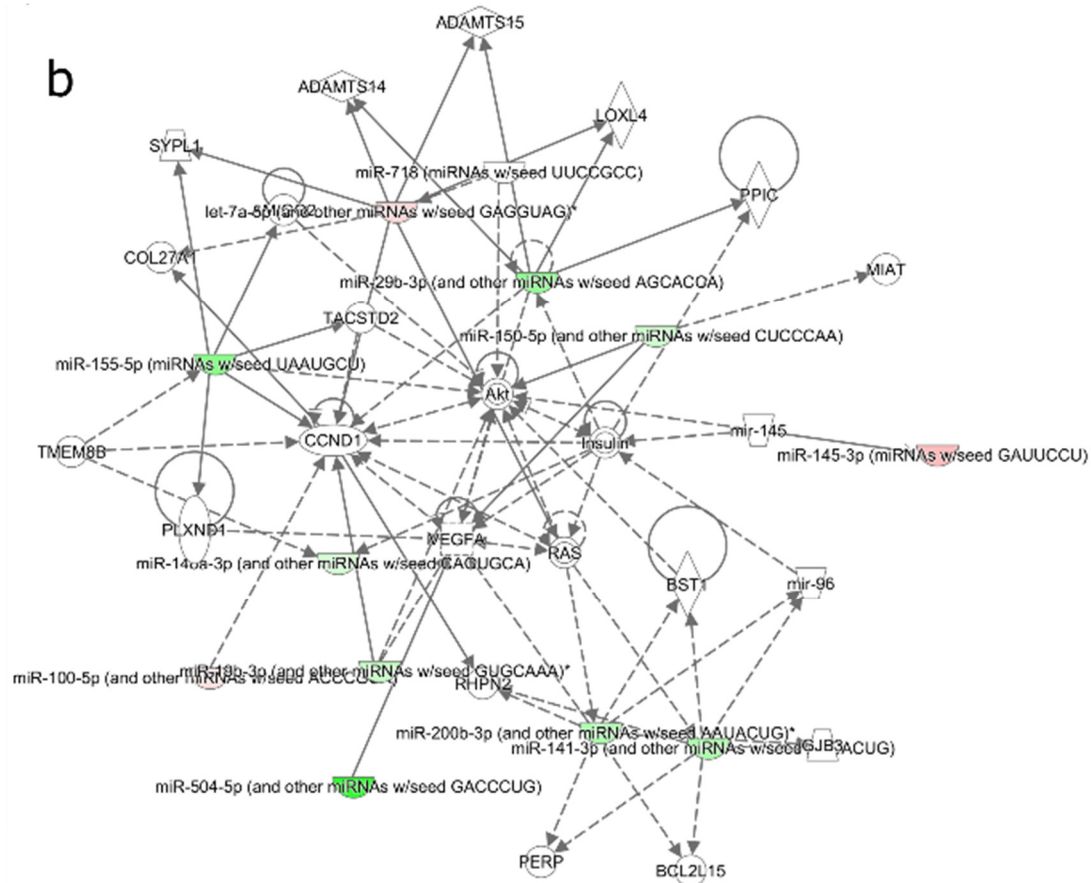



**Table S1.** Modified Bonar scoring system used to grade injured, sham and contralateral control tendons.

|                     | Grade                                                                                       |                                                                                                 |                                                                                                                  |                                                                                         |
|---------------------|---------------------------------------------------------------------------------------------|-------------------------------------------------------------------------------------------------|------------------------------------------------------------------------------------------------------------------|-----------------------------------------------------------------------------------------|
|                     | 0                                                                                           | 1                                                                                               | 2                                                                                                                | 3                                                                                       |
| Cell morphology     | Inconspicuous elongated spindle shaped nuclei with no obvious cytoplasm at light microscopy | Increased roundness: nucleus becomes more ovoid to round in shape without conspicuous cytoplasm | Increased roundness and size; the nucleus is round, slightly enlarged and a small amount of cytoplasm is visible | Nucleus is round, large with abundant cytoplasm and lacuna formation (chondroid change) |
| Cellularity         | Mainly discrete cells                                                                       | Hyper cellular, in rows and/or increased cell numbers                                           | Areas of hypo as well as hyper cellularity                                                                       | Area of assessment is mostly a-cellular                                                 |
| Vascularity         | No vessels present in FOV/<br>Inconspicuous blood vessels coursing between bundles          | Occasional cluster of vessel                                                                    | 2–3 clusters of capillaries/vessels                                                                              | Areas with greater than 3 clusters                                                      |
| Tissue Organisation | Collagen fibres arranged linearly with cell nuclei aligned with long axis of tendon         | Small loss of collagen and cell alignment in regions                                            | Moderate loss of collagen and cell alignment                                                                     | Complete loss of collagen and cell alignment, matrix appears disorganised               |

**Table S2.** Primary and secondary antibodies and blocking conditions used for immunolabelling.

| Primary Antibody    | Supplier                           | Dilution | Secondary Antibody   | Supplier | Dilution | Blocking conditions            |
|---------------------|------------------------------------|----------|----------------------|----------|----------|--------------------------------|
| CD146               | Abcam (ab75769)                    | 1:100    | Goat anti-rabbit IgG | Dako     | 1:500    | 5% goat & 5% rat serum; 1% BSA |
| Pan-Laminin         | Abcam (ab11575)                    | 1:100    | Goat anti-rabbit IgG | Dako     | 1:500    | 5% goat & 5% rat serum; 1% BSA |
| Laminin- $\alpha$ 4 | St. John's Laboratories (STJ93891) | 1:100    | Goat anti-rabbit IgG | Dako     | 1:500    | 5% goat & 5% rat serum; 1% BSA |
| SDF-1               | Abcam (ab9797)                     | 1:100    | Goat anti-rabbit IgG | Dako     | 1:500    | 5% goat & 5% rat serum; 1% BSA |

|              |                                    |       |                      |      |       |                                |
|--------------|------------------------------------|-------|----------------------|------|-------|--------------------------------|
| CXCR-4       | St. John's Laboratories (STJ97564) | 1:100 | Goat anti-rabbit IgG | Dako | 1:500 | 5% goat & 5% rat serum; 1% BSA |
| CD14         | Bioss (BS-1192R)                   | 1:200 | Goat anti-rabbit IgG | Dako | 1:500 | 5% goat & 5% rat serum; 1% BSA |
| CD163        | Bioss (BS-2527R-BSS)               | 1:400 | Goat anti-rabbit IgG | Dako | 1:500 | 5% goat & 5% rat serum; 1% BSA |
| CD86         | R&D systems (AF1340)               | 1:45  | Rabbit anti-goat IgG | Dako | 1:500 | 1% BSA                         |
| CD31         | Abcam (ab28364)                    | 1:100 | Goat anti-rabbit IgG | Dako | 1:500 | 5% goat & 5% rat serum; 1% BSA |
| PCNA         | St. John's Laboratories (STJ94982) | 1:100 | Goat anti-rabbit IgG | Dako | 1:500 | 5% goat & 5% rat serum; 1% BSA |
| Collagen-III | St. John's Laboratories (STJ92388) | 1:100 | Goat anti-rabbit IgG | Dako | 1:500 | 5% goat & 5% rat serum; 1% BSA |
| CD271        | St. John's Laboratories (STJ94481) | 1:100 | Goat anti-rabbit IgG | Dako | 1:500 | 5% goat & 5% rat serum; 1% BSA |
| TGF- $\beta$ | St. John's Laboratories (STJ95997) | 1:500 | Goat anti-rabbit IgG | Dako | 1:500 | 5% goat & 5% rat serum; 1% BSA |
| Scleraxis    | Biorbyt (orb158355)                | 1:100 | Goat anti-rabbit IgG | Dako | 1:500 | 5% goat & 5% rat serum; 1% BSA |

**Table S3.** Details of miRNA assays used to validate RNA-sequencing results.

| ID          | Gene ID        | miRNA sequence          | Product Code |
|-------------|----------------|-------------------------|--------------|
| let-7c-5p   | MIMAT0000064   | UGAGGUAGUAGGUUGUAUGGUU  | YP00204767   |
| miR-140-3p  | MIMAT0004597   | UACCACAGGGUAGAACCACGG   | YP00204304   |
| miR-103a-3p | MIMAT0000101   | AGCAGCAUUGUACAGGGCUAUGA | YP00204063   |
| miR-365-5p  | MIMAT0017184   | GAGGGACUUUCAGGGGC       | YP02118503   |
| miR-338-5p  | MIMAT0004646   | AACAAUAUCCUGGUGCUGAGUG  | YP00204114   |
| miR-143-3p  | MIMAT0000849   | UGAGAUGAAGCACUGUAGCUCA  | YP00205106   |
| miR-195-3p  | MIMAT0017149   | CCAAUAUUGGCUGUGCUGCUCCA | YP02103742   |
| miR-672-5p  | MIMAT0005327   | UGAGGUUGGUGUACUGUGUGUGA | YP00205170   |
| miR-218a-5p | MIMAT0000888_1 | UUGUGCUUGAUCUAACCAUGU   | YP00206034   |
